# Supplementary material
Source: PubMed Central journal article supplement (PMC4361001)
Supplement: NIHMS646523-supplement-1.pdf [file NIHMS646523-supplement-1.pdf]

**A**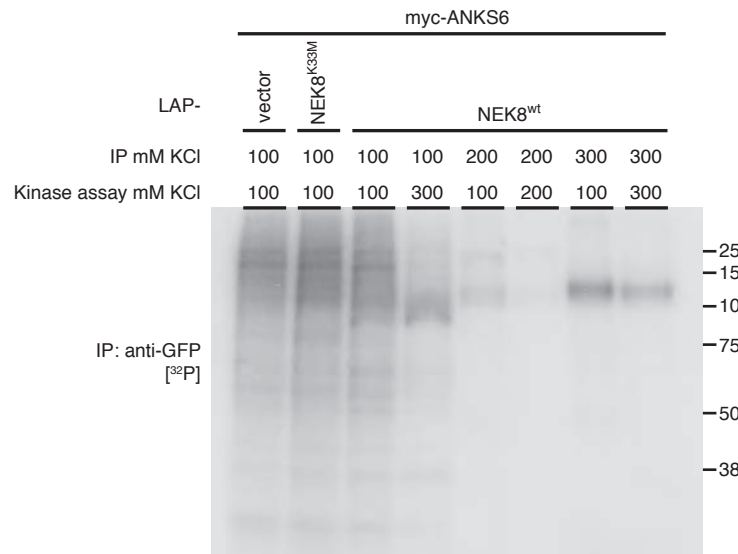**B**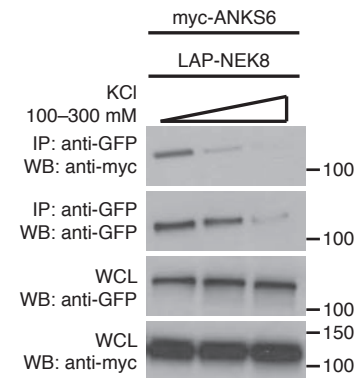**C**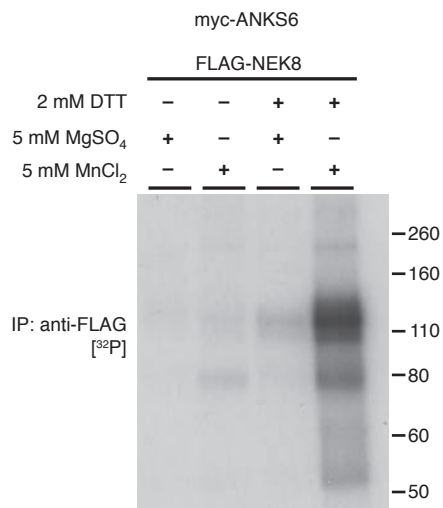**D**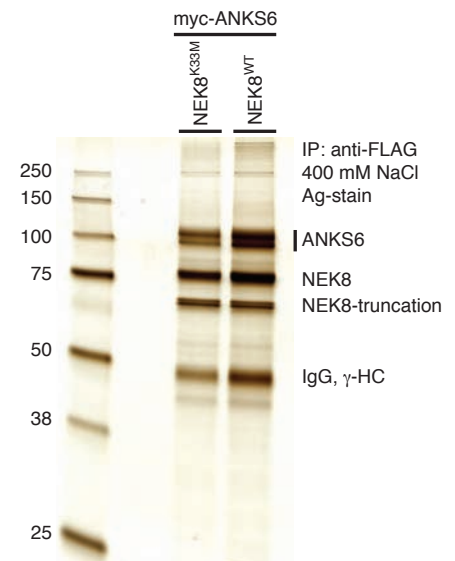**Supplementary Figure 1 | NEK8/ANKS6 kinase activity conditions**

A, B – Higher ionic strength conditions interfere with efficient IP of LAP-NEK8 with anti-GFP antibody (B), but also permit higher specificity of phosphorylation reactions (A). Note that LAP-NEK8 and myc-ANKS6 appear at about the same molecular weight. Low-salt conditions are favorable for the kinase reaction itself, but result in much less specific phosphorylation. Importantly, nonspecific copurifying kinase activity produces an autoradiographic background in the case of empty vector or the “kinase-dead” NEK8<sup>K33M</sup> allele (1st and 2nd lane) that is indistinguishable from wildtype kinase activity with IP and kinase assay salt concentrations of 100 mM KCl. C – NEK8/ANKS6 kinase activity is higher with Mn<sup>2+</sup>, as compared to Mg<sup>2+</sup> and strongly depends on the presence of reducing conditions. D – FLAG-NEK8 wildtype and K33M coprecipitate with myc-ANKS6. Cell lysis, IP and washing at 400 mM NaCl gives very clean results, as demonstrated by silver staining. The major bands, as analyzed by mass spectrometry, represent ANKS6, NEK8, a coprecipitating intracellular NEK8 truncation, and the immunoglobulin used for IP.

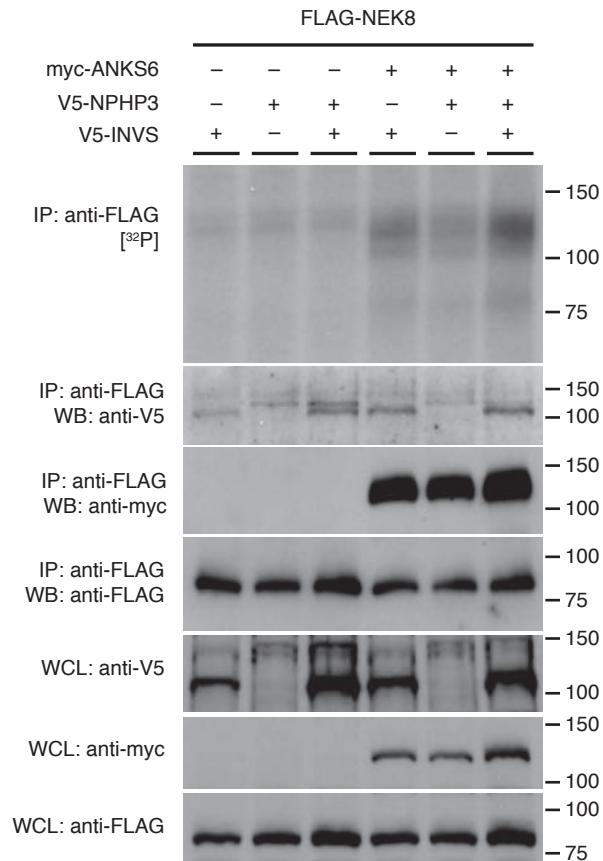

### Supplementary Figure 2 | ANKS6 is unique within the NEK8/ANKS6/INVS/NPHP3 complex to stimulate NEK8 phosphorylation activity and serve as a kinase substrate

Coexpression, IP and kinase assays of NEK8 in combination with all other IC components reveals an exclusive dependency on ANKS6 for activation of phosphorylation activity. Significant phosphorylation of inversin or NPHP3 cannot be clearly identified. Note that cell lysis and IP conditions require an ionic strength of not higher than 100 mM NaCl in order to recover the entire complex, while most other lysis and IP protocols presented here employ 400 mM NaCl. The higher background in the autoradiogram is due to this adjustment (compare also Supplementary Fig. 1a).

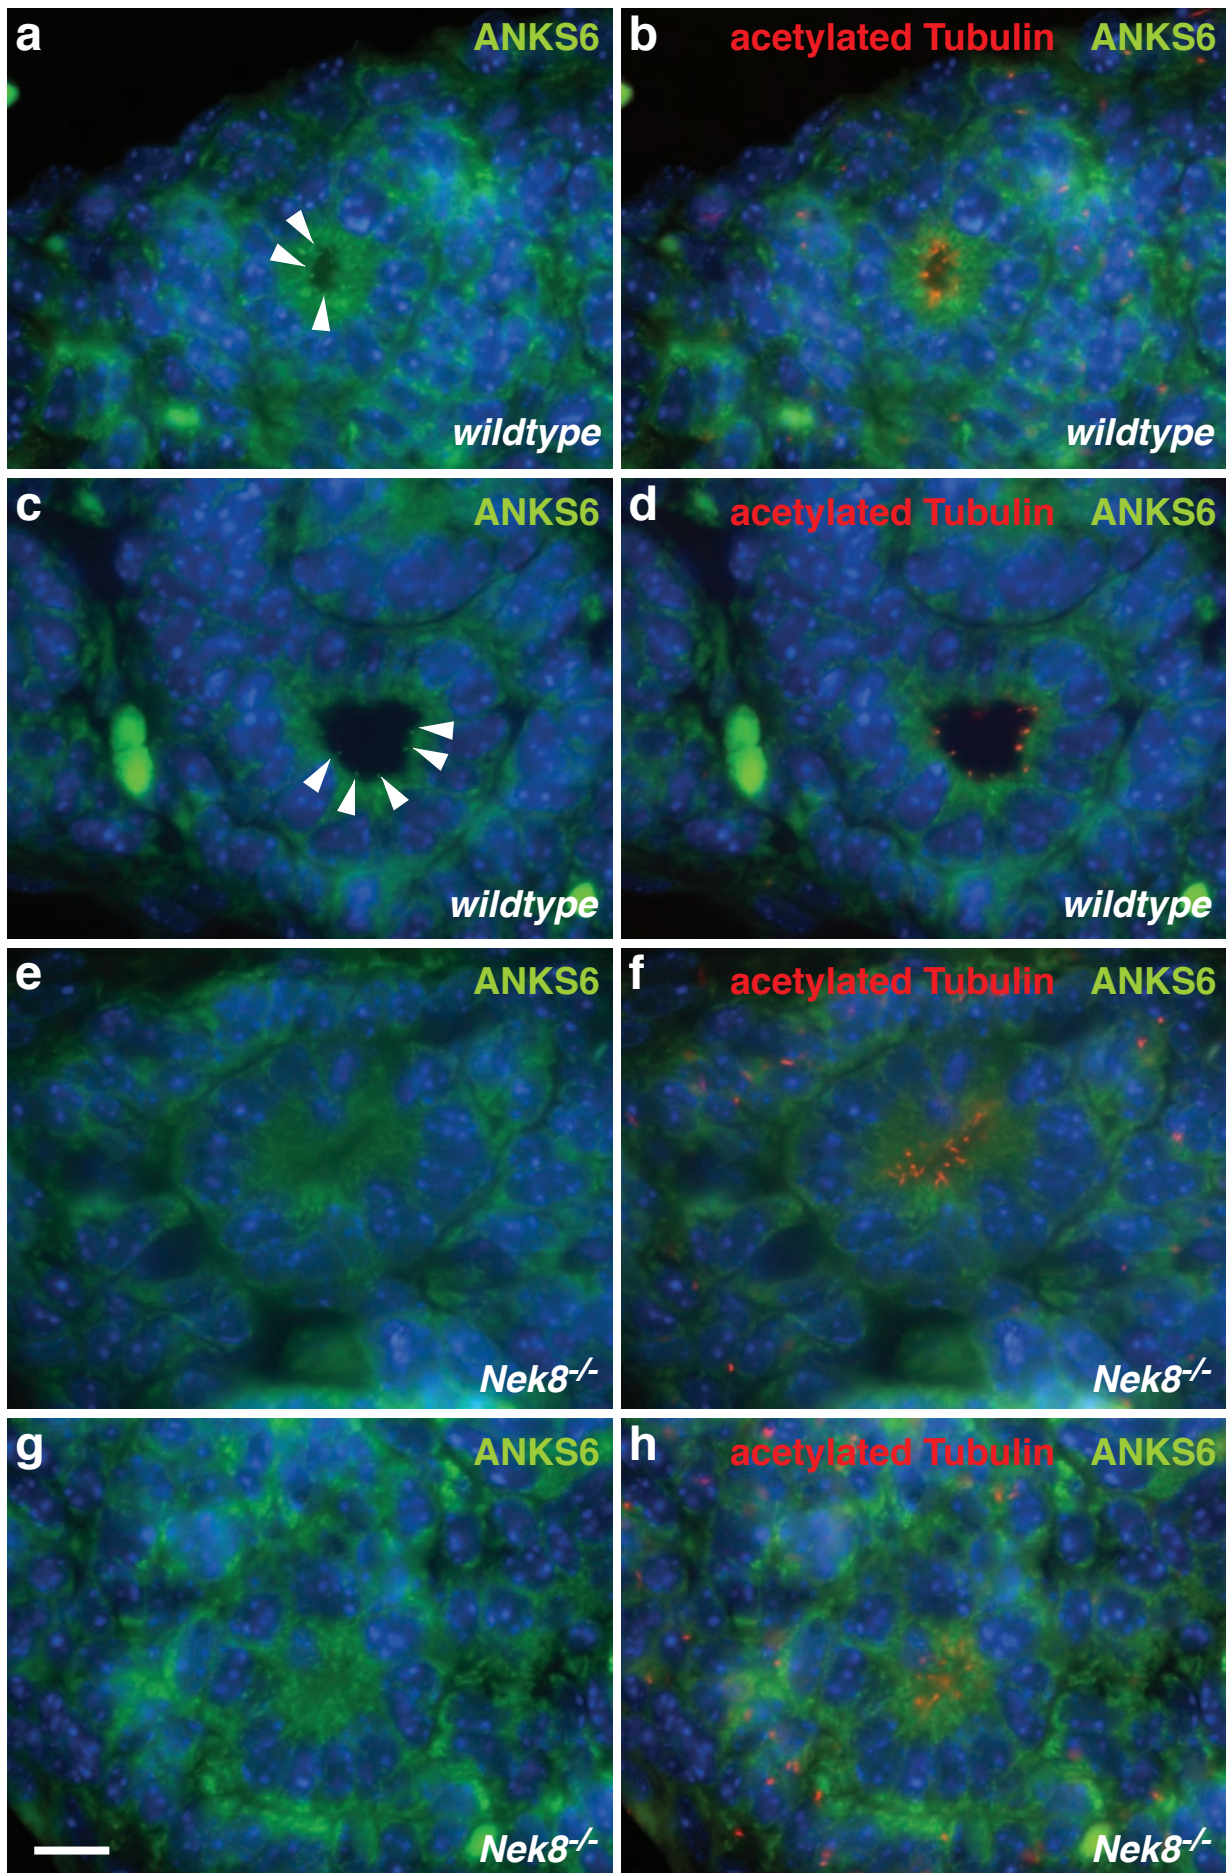

---

**Supplementary Figure 3 | Fluorescence immunohistochemistry of ANKS6 in neonatal wildtype and *Nek8*<sup>-/-</sup> mutant kidneys**

Native ANKS6 is only detected in a dot-like appearance in the proximal segment of renal tubular epithelial cilia, corresponding to the localization of the ciliary inversin compartment. This pattern is only observed in wildtype kidney sections (a, c; green labels ANKS6), and could not be detected in kidney sections of *Nek8*<sup>-/-</sup> mutants (e, g). Counterstaining against acetylated tubulin allows identification of cilia in the same sections (b, d, f, h: red labels cilia). Scale bar: 5  $\mu$ m.



**A**

**ANK-repeat V.**

|               |                                 |
|---------------|---------------------------------|
| H. sapiens    | LDITALMAAIQHGHEAVVRLLEWGWADPNH  |
| R. norvegicus | LGITALMAAVQHGHEAVVRLLEWGWADPNH  |
| M. musculus   | LGITALMAAVQHGHEAVVRLLEWGWADPNH  |
| G. gallus     | PDITPLMAAAQHGHEAVVHLLLDWGWADPNY |
| X. tropicalis | PDITALMTATQHAHEAVVRLLLDWGWADVNY |
| D. rerio      | LEVRALLAAAQHGQGAVALLLDWGSDARV   |

**B**

|               |                                                  |
|---------------|--------------------------------------------------|
| H. sapiens    | HVH <del>THL</del> ILHRDLK <del>TQ</del> NILLDKH |
| R. norvegicus | HVH <del>THL</del> ILHRDLK <del>TQ</del> NILLDKH |
| M. musculus   | HVH <del>THL</del> ILHRDLK <del>TQ</del> NILLDKH |
| G. gallus     | HVHTKQILHRDLK <del>TQ</del> NILLDKH              |
| X. tropicalis | HVHTKLILHRDLK <del>TQ</del> NILLDKH              |
| D. rerio      | HVHNKLIILHRDLK <del>TQ</del> NILLDKH             |

**C**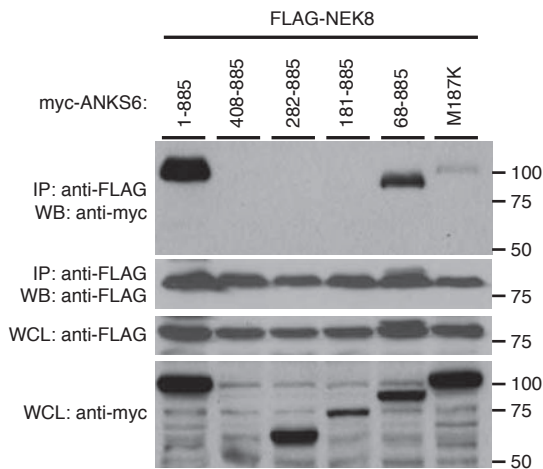**D**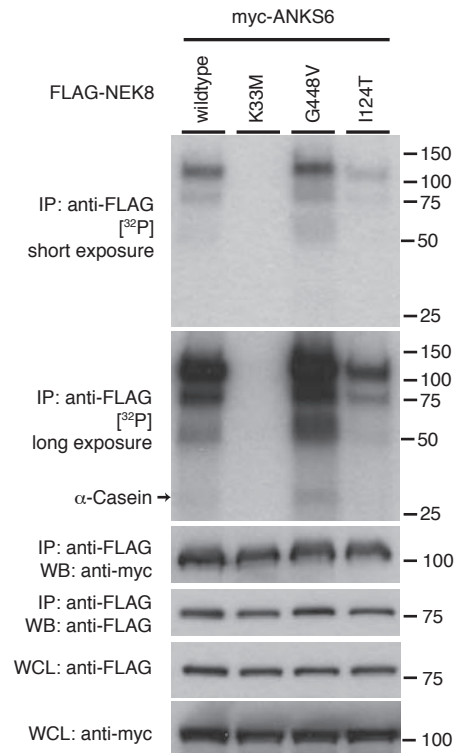

### Supplementary Figure 4 | Alignment of mutant ANKS6 and NEK8 sequences

A – The M187K mutation (highlighted in yellow) is located within the ankyrin repeat V of ANKS6.

B – The I124T mutation (highlighted in orange) is located within the kinase domain of NEK8. The invariant catalytic loop HRD-motif and asparagine are highlighted in green.

C – Direct comparison of ANKS6 truncations and M187K mutation in co-IP with NEK8. The ANKS6(68-885) variant shows reduced binding to NEK8, as compared to the wildtype; the binding of ANKS6(M187K) is even more reduced.

D – Direct comparison of kinase activities of wildtype, K33M, G448V<sup>ick</sup> and I124T<sup>roc</sup> mutants of NEK8, in presence of ANKS6. K33M serves as a negative control. There are no significant differences between wildtype and G448V, but again, a striking reduction in kinase activity of I124T. Mild background kinase activity of I124T can be visualized after prolonged autoradiography exposure.

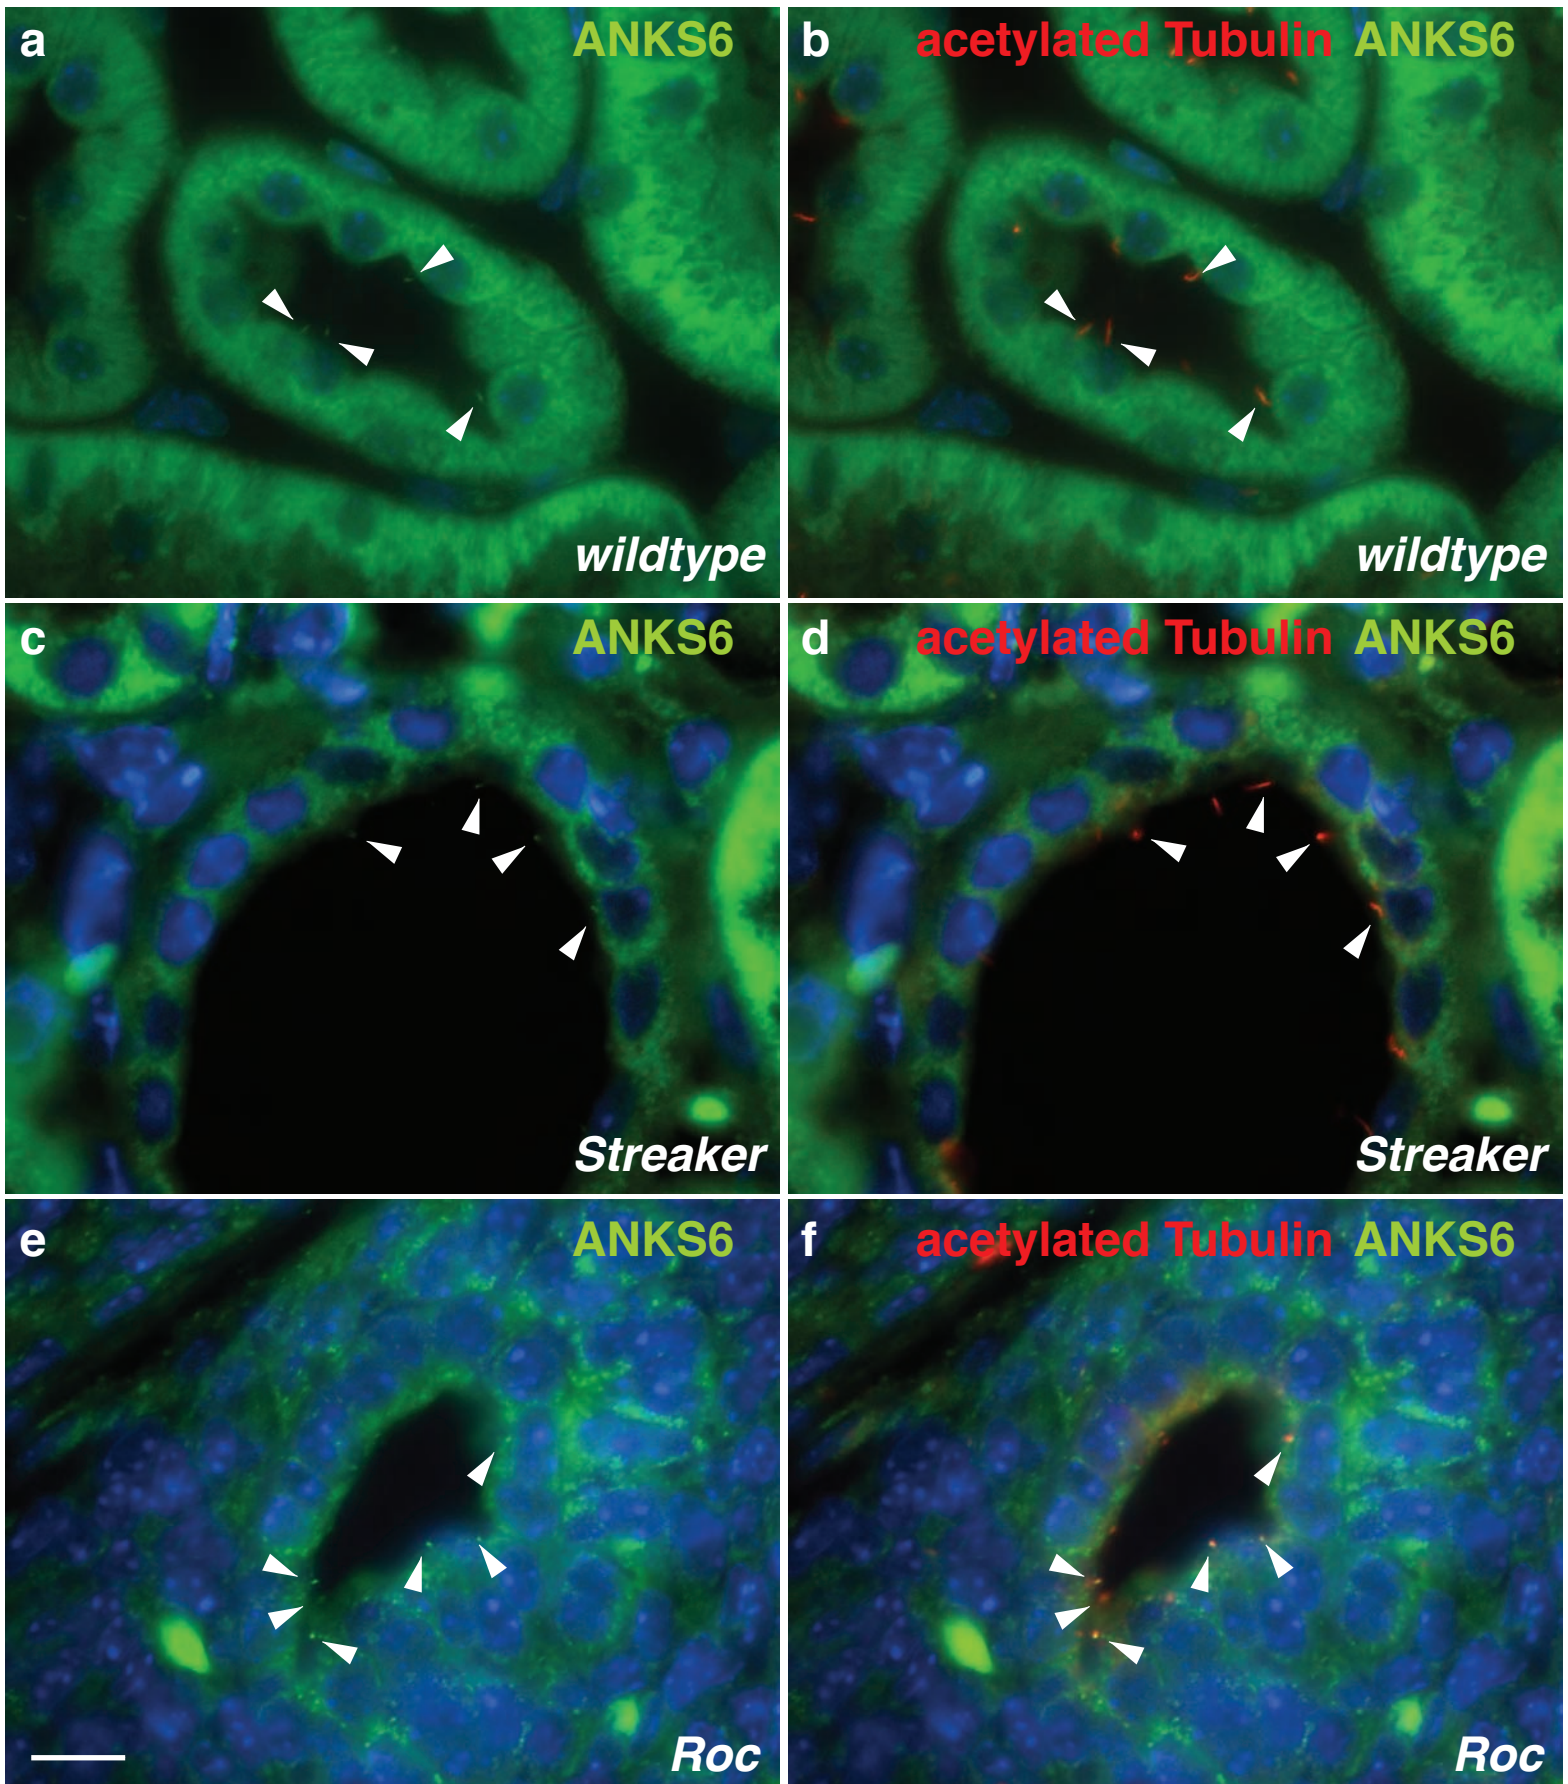

---

**Supplementary Figure 5 | Fluorescence immunohistochemistry of ANKS6 in neonatal wildtype, Streaker and Roc mutant kidneys**

Native ANKS6 is detected in a dot-like appearance in the proximal segment of renal tubular epithelial cilia, corresponding to the localization of the ciliary inversin compartment. This pattern is observed in all examined mutants (a, c, e; green labels ANKS6); counterstaining against acetylated tubulin allows identification of cilia in the same sections (b, d, f: red labels cilia). Scale bar: 10  $\mu$ m.

Fig 1C

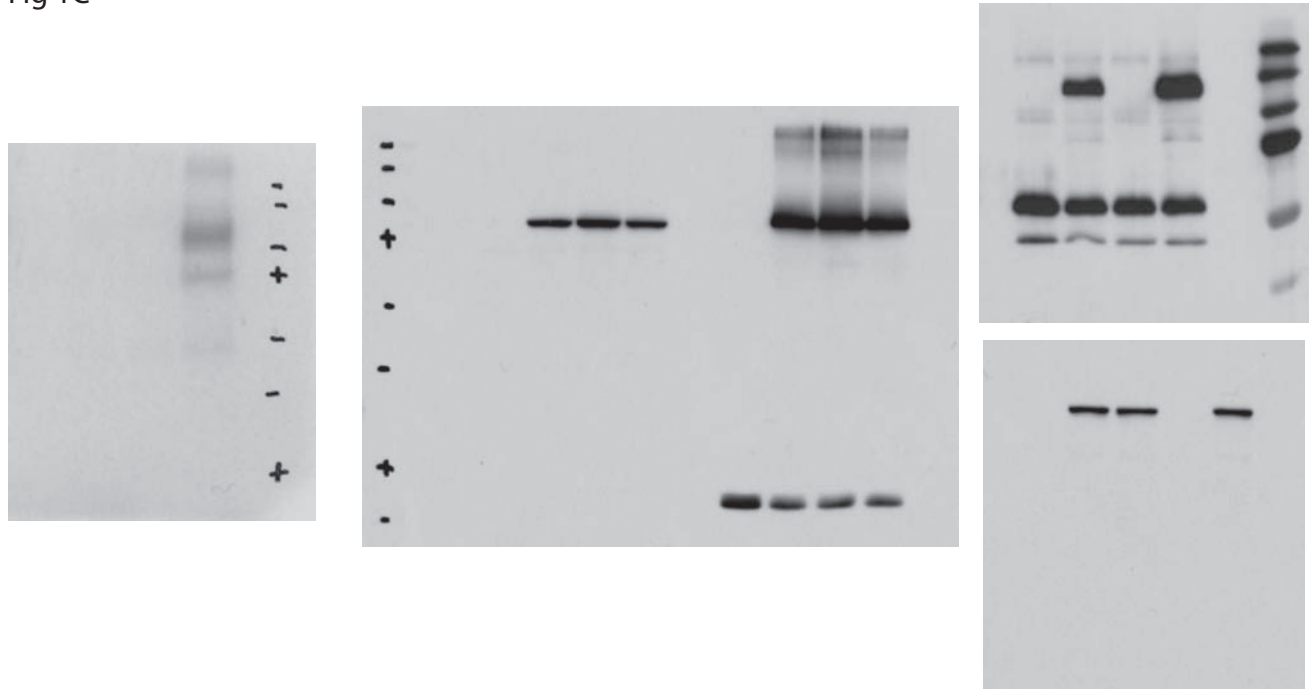

Fig 2B

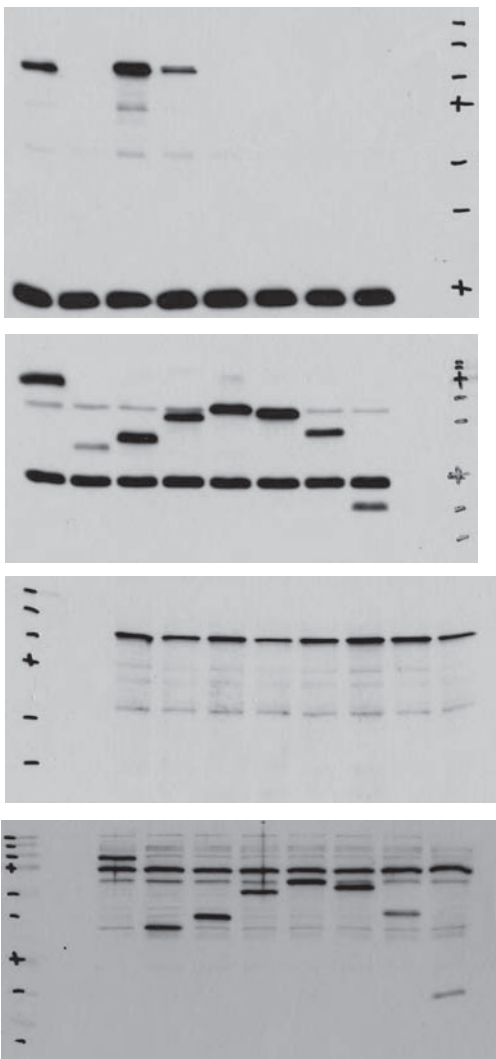

Fig 2C

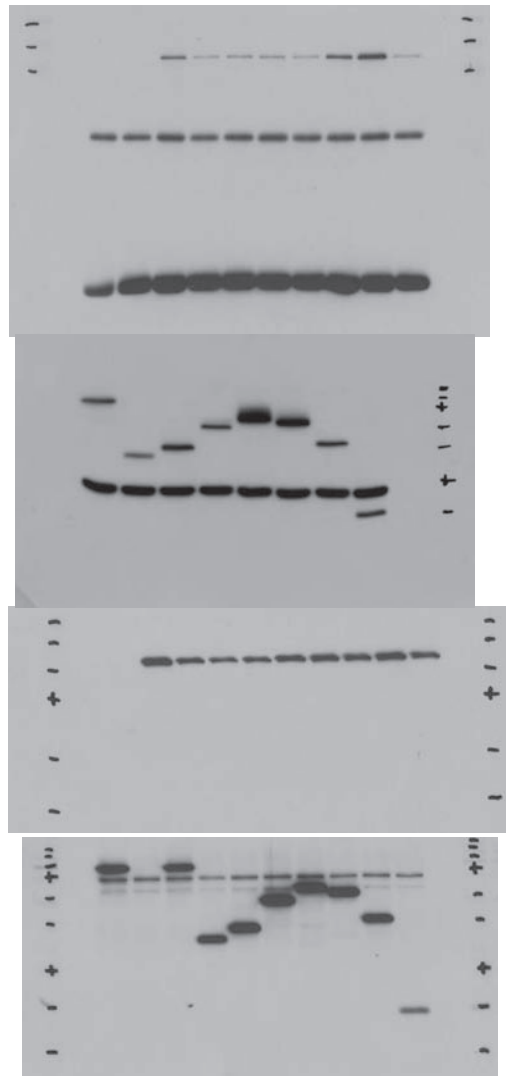

Fig 1D

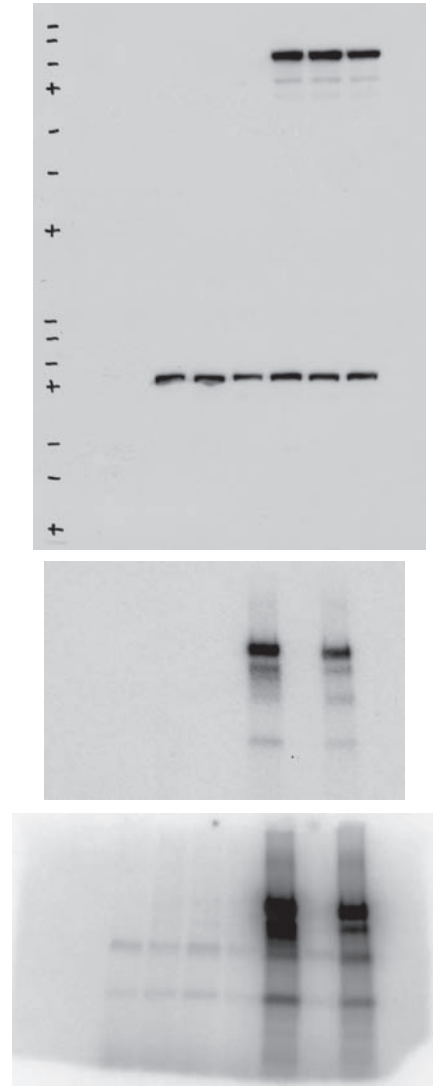



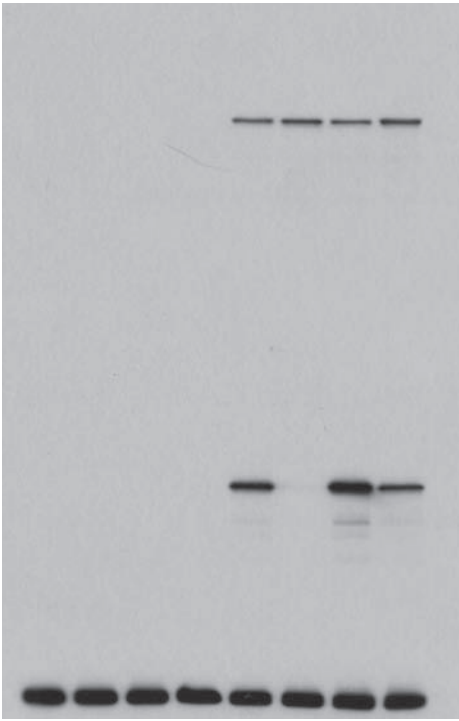

Fig. 2D

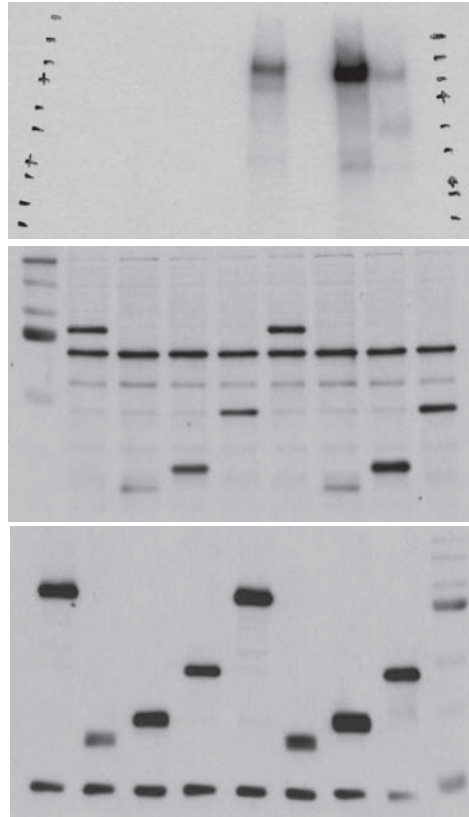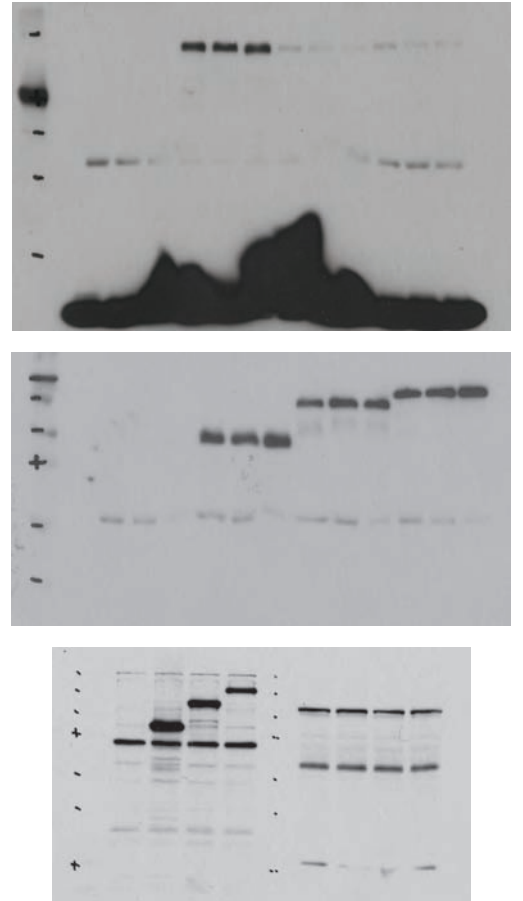

Fig 2E

Fig 6E

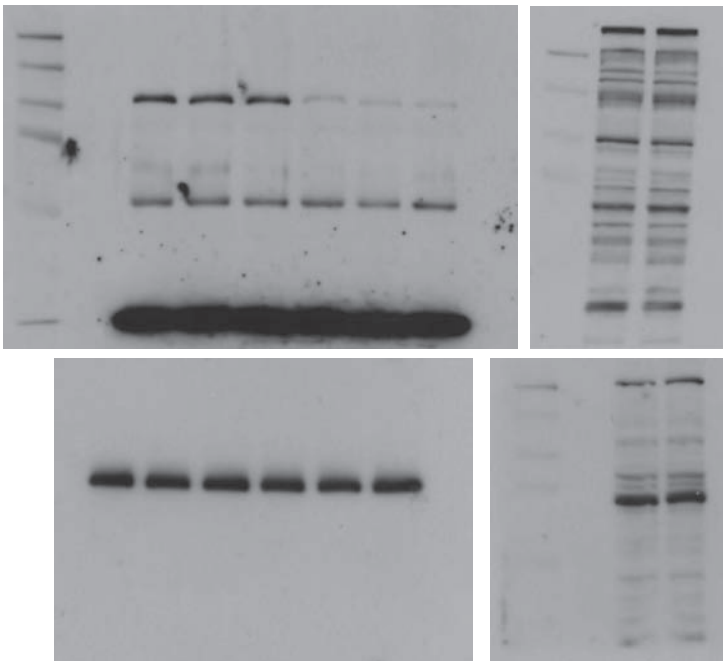

Fig 6F

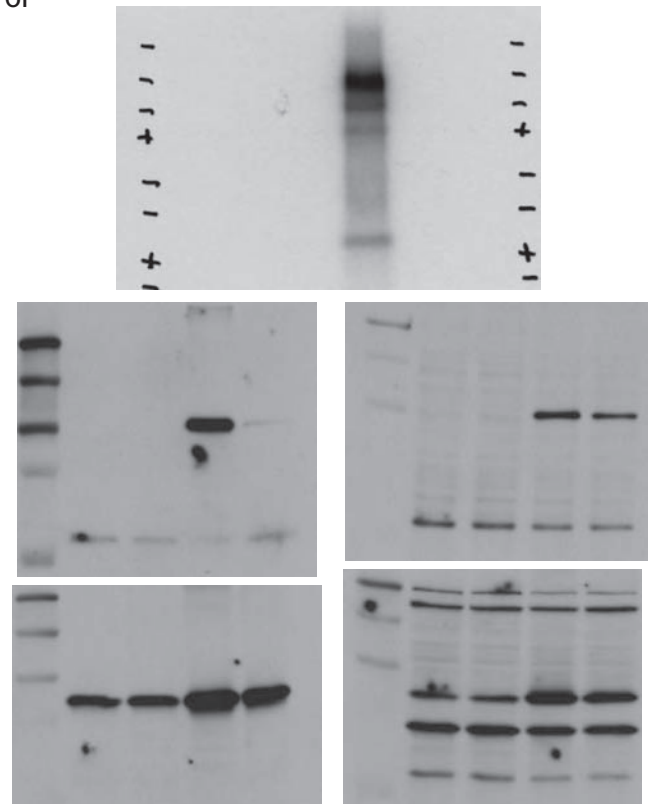

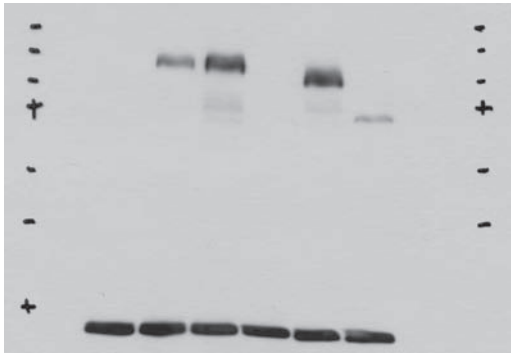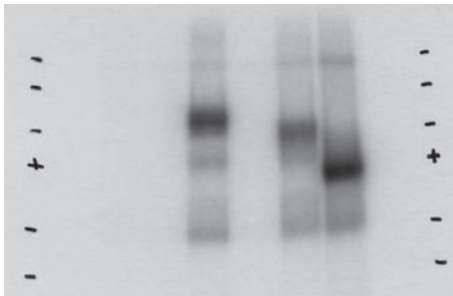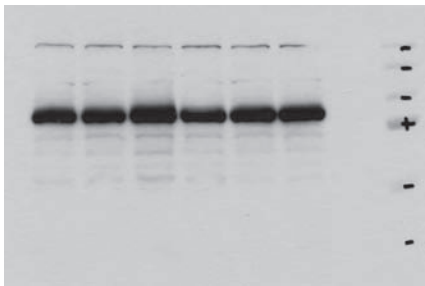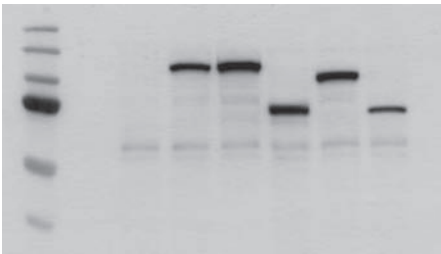

Fig 3B

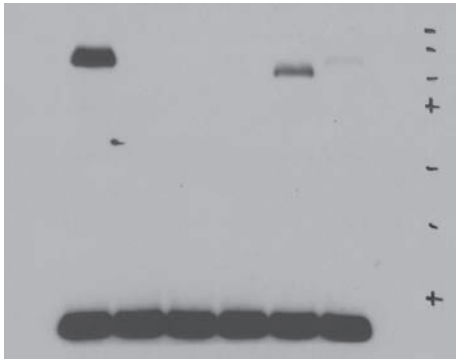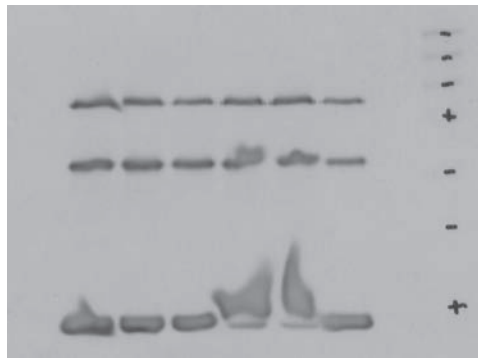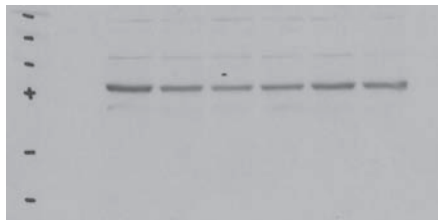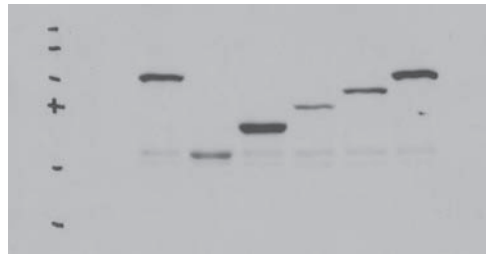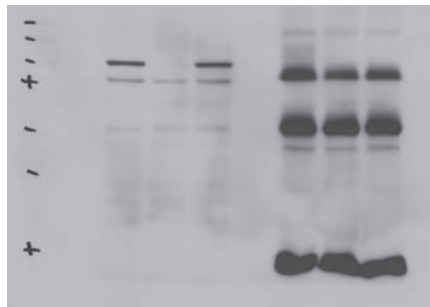

Fig 3C/6D

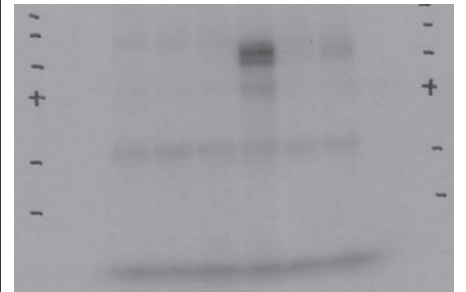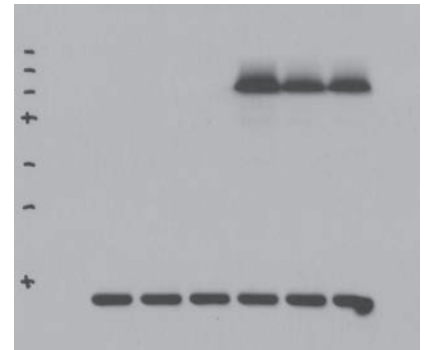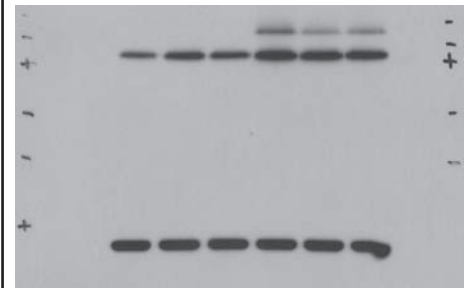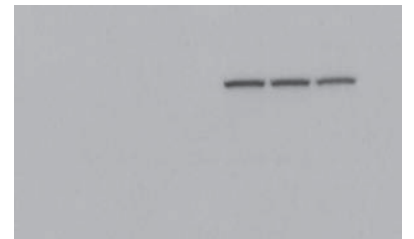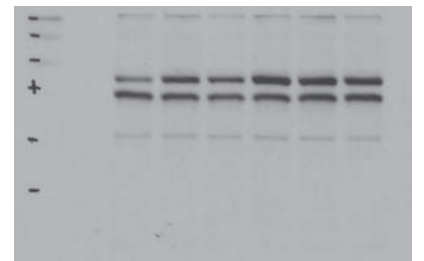

Fig 6H

|             | Left | Right | Midline | n  | % laterality defect |
|-------------|------|-------|---------|----|---------------------|
| Uninjected  | 34   | 3     | 0       | 37 | <b>8</b>            |
| ANKS6-MO1   | 34   | 17    | 1       | 52 | <b>35</b>           |
|             |      |       |         |    |                     |
| Uninjected  | 41   | 3     | 4       | 48 | <b>15</b>           |
| NEK8 ATG MO | 31   | 15    | 8       | 54 | <b>43</b>           |

### Supplementary Table 1 | Heart looping phenotypes in zebrafish ANKS6 and NEK8 morphants

Zebrafish ANKS6 and NEK8 morphants exhibit defective L/R-asymmetry determination. Heart looping laterality was observed after in situ hybridization (<http://zfin.org/ZFIN/Methods/ThisseProtocol.html>) for the cardiac marker *cm1c2* at 48 hours post fertilization, and after injection of 250  $\mu$ M of the respective morpholino (MO; GeneTools, Philomath, OR) at the one-cell-stage. Zebrafish were maintained according to established IACUC protocols. Please refer to Supplementary Table 4 for morpholino sequences.

|    | Situs | Heart | Loop | Arch   | Atria | OFT <sup>2</sup> | Septal Defects <sup>3</sup> | IVC <sup>4</sup> | Van <sup>5</sup> Praagh | Epart <sup>6</sup> Bronch | Lung        | Abdm Situs <sup>7</sup> | Liver | Stom  | Spleen | Pancr |
|----|-------|-------|------|--------|-------|------------------|-----------------------------|------------------|-------------------------|---------------------------|-------------|-------------------------|-------|-------|--------|-------|
| 1  | HTX   | Left  | D    | Left   | RAI   | D-TGA            | AVSD                        | Dual             | S,D,D                   | LI                        | RI (4R/3L)  | Dsc                     | Nml   | Right | Right  | Right |
| 2  | HTX   | Right | L    | Right  | Inv   | D-TGA            | None                        | Left             | I,L,L                   | LI                        | RI (4R/3L)  | Inv                     | Inv   | Right | Right  | Right |
| 3  | HTX   | Right | D    | Left   | Inv   | D-TGA            | AVSD, mVSD                  | Left             | I,D,D                   | Right                     | RI (4R/3L)  | Dsc                     | Nml   | Right | Right  | Right |
| 4  | HTX   | Right | L    | Right  | Inv   | DOmRV            | pmVSD                       | Left             | I,L,L                   | Left                      | Inv (2R/3L) | Nml                     | Nml   | Left  | Left   | Left  |
| 5  | HTX   | Right | L    | Right  | Inv   | D-TGA            | AVSD                        | Right            | I,L,L                   | Left                      | RI (4R/3L)  | Nml                     | Nml   | Left  | Left   | Left  |
| 6  | HTX   | Right | L    | Right  | Inv   | DOmRV            | AVSD, pm/mVSD               | Left             | I,L,L                   | Left                      | Inv (2R/3L) | Dsc                     | Nml   | Right | Right  | Right |
| 7  | HTX   | Right | L    | Double | Inv   | L-TGA            | mVSD                        | Right            | I,L,L                   | Left                      | Inv (2R/3L) | Inv                     | Inv   | Right | Right  | Right |
| 8  | HTX   | Right | D    | Right  | RAI   | D-TGA            | AVSD o+mVSD                 | Dual             | A,D,D                   | RI                        | Inv (2R/3L) | Nml                     | Nml   | Left  | Left   | Left  |
| 9  | HTX   | Left  | D    | Left   | Inv   | D-TGA            | AVSD                        | Left             | A,D,D                   | Right                     | RI (4R/3L)  | Inv                     | Inv   | Right | Right  | Right |
| 10 | HTX   | Right | L    | Right  | Inv   | oAo              | mVSD                        | Left             | I,L,I                   | Left                      | Inv (2R/3L) | Dsc                     | Nml   | Right | Right  | Right |
| 11 | HTX   | Right | L    | Right  | Inv   | DOmRV            | pmVSD                       | Right            | I,L,L                   | Left                      | RI (4R/3L)  | Nml                     | Nml   | Left  | Left   | Left  |
| 12 | HTX   | Right | L    | Right  | RAI   | L-TGA            | AVSD                        | Dual             | A,L,L                   | LI                        | RI (4R/3L)  | Dsc                     | Inv   | Left  | Left   | Left  |
| 13 | HTX   | Left  | D    | Left   | ND    | Nml              | ND                          | Right            | ND                      | ND                        | Nml (3R/2L) | Dsc                     | Nml   | left  | Right  | Right |
| 14 | HTX   | Right | L    | Right  | RAI   | Inv              | AVSD, mVSD                  | Dual             | A,L,I                   | Left                      | LI (1R/1L)  | Nml                     | Nml   | Left  | Left   | Left  |
| 15 | HTX   | Right | L    | Right  | RAI   | L-TGA            | pmVSD                       | Dual             | A,L,L                   | Left                      | LI (1R/2L)  | Inv                     | Inv   | Right | Right  | Right |
| 16 | HTX   | Left  | D    | Left   | RAI   | D-TGA            | ND                          | Right            | A,D,D                   | Right                     | RI (4R/3L)  | Dsc                     | Nml   | Left  | Left   | Left  |
| 17 | HTX   | Left  | D    | Left   | Inv   | D-TGA            | AVSD, pmVSD                 | Left             | I,L,L                   | LI                        | RI (4R/3L)  | Inv                     | Inv   | Right | Right  | Right |
| 18 | HTX   | Right | D    | Left   | RAI   | D-TGA            | AVSD                        | Dual             | A,D,D                   | LI                        | RI (4R/3L)  | Nml                     | Nml   | Left  | Left   | Left  |
| 19 | HTX   | Left  | D    | Left   | Nml   | Nml              | None                        | Middle           | S,D,S                   | Left                      | Am (3R/1L)  | Dsc                     | Nml   | Right | Right  | Right |
| 20 | HTX   | Left  | D    | Left   | Nml   | Nml              | None                        | Right            | S,D,S                   | ND                        | Nml (3R/2L) | Inv                     | Inv   | Right | Right  | Right |
| 21 | SIT   | Right | L    | Right  | Inv   | Inv              | None                        | Left             | I,L,L                   | Left                      | Inv (2R/3L) | Inv                     | Inv   | Right | Right  | Right |
| 22 | SIT   | Right | L    | Right  | Inv   | Inv              | None                        | Left             | I,L,I                   | Left                      | Inv (2R/3L) | Inv                     | Inv   | Right | Right  | Right |
| 23 | SIT   | Right | L    | Right  | Inv   | Inv              | None                        | Right            | I, L, I                 | Left                      | Inv (2R/3L) | Inv                     | Inv   | Right | Right  | Right |
| 24 | SIT   | Right | L    | Right  | ND    | Inv              | ND                          | Left             | ND                      | ND                        | Inv (2R/3L) | Inv                     | Inv   | Right | Right  | Right |
| 25 | SIT   | Right | L    | Right  | Inv   | Inv              | None                        | Left             | I,L,I                   | Left                      | Inv (2R/3L) | Inv                     | Inv   | Right | Right  | Right |
| 26 | SIT   | Right | L    | Right  | Inv   | Inv              | None                        | left             | I,L,I                   | Left                      | Inv (2R/3L) | Inv                     | Inv   | Right | Right  | Right |
| 27 | SIT   | Right | L    | Right  | Inv   | Inv              | None                        | ND               | I,L,I                   | ND                        | Inv (2R/3L) | Inv                     | Inv   | Right | Right  | Right |
| 28 | SIT   | Right | L    | Right  | Inv   | Inv              | None                        | Left             | I,L,I                   | ND                        | Inv (2R/3L) | Inv                     | Inv   | Right | Right  | Right |
| 29 | SIT   | Right | L    | Right  | Inv   | Inv              | None                        | Left             | I,L,I                   | ND                        | Inv (2R/3L) | Inv                     | Inv   | Right | Right  | Right |
| 30 | SS    | Left  | D    | Left   | Nml   | Nml              | ND                          | Right            | S,D,S                   | ND                        | Nml (3R/2L) | Nml                     | Nml   | Left  | Left   | Left  |
| 31 | SS    | Left  | D    | Left   | Nml   | Nml              | ND                          | Right            | S,D,S                   | ND                        | Nml (3R/2L) | Nml                     | Nml   | Left  | Left   | Left  |
| 32 | SS    | Left  | D    | Left   | Nml   | Nml              | ND                          | Right            | S,D,S                   | ND                        | Nml (3R/2L) | Nml                     | Nml   | Left  | Left   | Left  |
| 33 | SS    | Left  | D    | Left   | Nml   | Nml              | ND                          | Right            | S,D,S                   | ND                        | Nml (3R/2L) | Nml                     | Nml   | Left  | Left   | Left  |
| 34 | SS    | Left  | D    | Left   | Nml   | Nml              | None                        | Dual             | S,D,S                   | Right                     | Nml (3R/2L) | Nml                     | Nml   | Left  | Left   | Left  |
| 35 | SS    | Left  | D    | Left   | Nml   | Nml              | None                        | Right            | S,D,S                   | ND                        | Nml (3R/2L) | Nml                     | Nml   | Left  | Left   | Left  |
| 36 | SS    | Left  | D    | Left   | Nml   | Nml              | None                        | Right            | S,D,S                   | ND                        | Nml (3R/2L) | Nml                     | Nml   | Left  | Left   | Left  |
| 37 | SS    | Left  | D    | Left   | Nml   | Nml              | None                        | Right            | S,D,S                   | ND                        | Nml(3R/2L)  | Nml                     | Nml   | Left  | Left   | Left  |
| 38 | SS    | Left  | D    | Left   | Nml   | Nml              | None                        | Right            | S,D,S                   | ND                        | Nml (3R/2L) | Nml                     | Nml   | Left  | Left   | Left  |
| 39 | SS    | Left  | D    | Left   | Nml   | Nml              | None                        | Right            | S,D,S                   | ND                        | Nml (3R/2L) | Nml                     | Nml   | Left  | Left   | Left  |

<sup>1</sup>HTX:heterotaxy, SIT: situs inversus totalis, SS: situs solitus; ND=not determined; None: no defect; Inv: inverted situs; Red fill=mirror symmetric, blue fill =normal, green fill=abnormal; <sup>2</sup>OFT: outflow tract; TGA: transposition of the great arteries, DOmRV: doublet outlet morphological right ventricle; <sup>3</sup>AVSD: atrioventricular septal defect, mVSD: muscular VSD, pmVSD: perimembranous VSD, oVSD: outlet VSD; <sup>4</sup>IVC: inferior vena cava; <sup>5</sup>Van Praagh classification of atrioventricular situs; <sup>6</sup>Epart Bronch: eparterial bronchus branch; <sup>7</sup>Abdm Situs: abdominal situs with combined assessment of stomach, spleen, liver situs. Dsc: discordant; <sup>8</sup>Abdm Situs: abdominal situs including position of stomach (Stom), spleen and pancreas (Pancr). Dsc: discordant.

## Supplementary Table 2 | Cardiac and Visceral Organ Situs Phenotype in *Anks6*<sup>Strkr</sup> Homozygous Mutants<sup>1</sup>

Cardiac and visceral organ situs phenotypes in *Anks6*<sup>Strkr</sup> homozygous mutant mice.



|   | Situs | Heart | Atria | Loop | Aortic Arch | Heart | OFT <sup>2</sup> | Septal Defect <sup>3</sup> | IVC <sup>4</sup> | Van <sup>5</sup> Praagh | Epiart <sup>6</sup> Bronch | Lung        | Abdm Situs <sup>7</sup> | Liver       | Stom  | Spleen | Pancr  |
|---|-------|-------|-------|------|-------------|-------|------------------|----------------------------|------------------|-------------------------|----------------------------|-------------|-------------------------|-------------|-------|--------|--------|
| 1 | HTX   | Left  | ND    | D    | Left        | ND    | Nml              | ND                         | Right            | S,D,I                   |                            | Nml (3R/1L) | Dsc                     | LI (2R/2L)  | Right | Right  | Right  |
| 2 | SIT   | Right | Inv   | L    | Right       | Inv   | Inv              | pmVSD, mVSD                | Left             | I,L,I                   | Left                       | Inv (1R/4L) | Inv                     | Inv (2R/1L) | Right | Right  | Right  |
| 3 | HTX   | Left  | Nml   | D    | Left        | Nml   | Nml              | pmVSD                      | Right            | S,D,S                   | Right                      | Nml (3R/1L) | Dsc                     | LI (2R/2L)  | Right | Right  | Right  |
| 4 | SIT   | Right | Inv   | L    | Right       | Inv   | Inv              | None                       | Left             | I,L,I                   | Left                       | Inv (1R/4L) | Inv                     | Inv (2R/1L) | Right | Right  | Right  |
| 5 | HTX   | Left  | RAI   | D    | Left        | RAI   | DORV             | AVSD, mVSD                 | Dual             | A,D,D                   | Right                      | LI (1R/2L)  | Dsc                     | Nml (1R/2L) | Right | Right  | Right  |
| 6 | HTX   | Left  | RAI   | D    | Left        | RAI   | Nml              | mVSD                       | Dual             | A,D,S                   | Right                      | RI (2R/1L)  | Dsc                     | LI (2R/2L)  | Right | Right  | Right  |
| 7 | SS    | Left  | ND    | D    | Left        | ND    | Nml              | ND                         | Right            | S,D,S                   | ND                         | Nml(3R/1L)  | Nml                     | Nml (1R/2L) | left  | left   | left   |
| 8 | SS    | Left  | ND    | D    | Left        | ND    | Nml              | ND                         | Right            | S,D,S                   | ND                         | Nml (3R/1L) | Nml                     | Nml (1R/2L) | left  | left   | left   |
| 9 | HTX   | Left  | ND    | D    | Left        | ND    | Nml              | ND                         | Right            | S,D,S                   | ND                         | LI (1R/1L)  | Nml                     | Nml (1R/2L) | left  | left   | middle |

<sup>1</sup>HTX:heterotaxy, SIT: situs inversus totalis, SS: situs solitus; ND=not determined; None: no defect; Inv: inverted situs; Red fill=mirror symmetric, blue fill =normal, green fill=abnormal;

<sup>2</sup>OFT: outflow tract; TGA: transposition of the great arteries, DORV: doublet outlet morphological right ventricle

<sup>3</sup>AVSD: atrioventricular septal defect, mVSD: muscular VSD, pmVSD: perimembranous VSD, oVSD: outlet VSD

<sup>4</sup>IVC: inferior vena cava

<sup>5</sup>Van Praagh classification of atrioventricular situs.

<sup>6</sup>Epart Bronch: eparterial bronchus branch; <sup>5</sup>Abdm Situs: abdominal situs with combined assessment of stomach, spleen, liver situs. Dsc: discordant.

<sup>7</sup>Abdm Situs: abdominal situs including position of stomach (Stom), spleen and pancreas (Pancr). Dsc: discordant.

### Supplementary Table 3 | Cardiac and Visceral Organ Situs Phenotype in *Nek8<sup>Roc</sup>* Homozygous Mutants<sup>1</sup>

Cardiac and visceral organ situs phenotypes in *Nek8<sup>Roc</sup>* homozygous mutant mice.

| Primer                | Sequence 5' to 3'                              |
|-----------------------|------------------------------------------------|
| mmNek8-BamHI-fwd      | CGGGATCCATGGAGAAGTACGAGCGAATCCGAG              |
| mmNek8-NotI-rev       | ATAGTTTACGCGCCGCTAGGGGGAACTGGTTCAT             |
| mmNek8-258-NotI-rev   | ATAGTTTACGCGCCGCTAGCAGAGGGGCTGCGC              |
| mmNek8-295-NotI-rev   | ATAGTTTACGCGCCGCTACCTGCTCCCTGTGCTGCCAG         |
| mmNek8-415-NotI-rev   | ATAGTTTACGCGCCGCTATCGGTCTGTCAAGCAAGC           |
| mmNek8-258-BamHI-fwd  | CGGGATCCATCCGGGCCCTACTCAAC                     |
| mmNek8-295-BamHI-fwd  | CGGGATCCAGGGCCACCAGTGCCCGAT                    |
| mmNek8-415-BamHI-fwd  | CGGGATCCGGCATTATCATGACGTTCCGG                  |
| mmNek8-K33M-fwd       | GGTGATCCTCATGCAGATCCCAGT                       |
| mmNek8-K33M-rev       | ACTGGGATCTGCATGAGGATCACC                       |
| mmNek8-G448V-fwd      | AAGCCTTGCTGGTCTATGAGATGGT                      |
| mmNek8-G448V-rev      | ACCATCTCATAGACCAGCAAGGCTT                      |
| mmNek8-I124T-fwd      | ACACACATCTCACCCCTGCATCGGG                      |
| mmNek8-I124T-rev      | CCCGATGCAGGGTGAGATGTGTGT                       |
| rnAnks6-BamHI-fwd     | CGGGATCCATGGGCGAGGGCGCG                        |
| rnAnks6-XbaI-rev      | TGCTCTAGACTACCTCCTGCTCGACACTGTTTCTTCTGGCCTTACC |
| rnAnks6-68-BamHI-fwd  | CGGGATCCGCGGGCAACTCGGCGC                       |
| rnAnks6-181-BamHI-fwd | CGGGATCCCTGGGCATCACAGCCCTG                     |
| rnAnks6-282-BamHI-fwd | CGGGATCCAAGAGGCGACCTGATATTTTCC                 |
| rnAnks6-408-BamHI-fwd | CGGGATCCTGCATGCAGGTGAATAAGGACCG                |
| rnAnks6-607-XbaI-rev  | TGCTCTAGACTAGAATTTGACTGGCCTGCCAGCAGC           |
| rnAnks6-758-XbaI-rev  | TGCTCTAGACTAGTGGGACGAGGAGGAAGAC                |
| rnAnks6-M187K-fwd     | CACAGCCCTGAAGGCTGCCGTCC                        |
| rnAnks6-M187K-rev     | GGACGGCAGCCTTCAGGGCTGTG                        |
| hsINVS-BamHI-fwd      | CGGGATCCATGAACAAGTCAGAGAACCTG                  |
| hsINVS-NotI-rev       | ATAGTTTACGCGCCGCTAAGGTTTTGTTTTGTTTTTGGC        |
| hsNPHP3-BamHI-fwd     | CGGGATCCATGGGGACCGCCTCGT                       |
| hsNPHP3-NotI-rev      | ATAGTTTACGCGCCGCTACCTTTGTCCTTGCTGAAG           |

| Morpholino    | Sequence 5' to 3'          |
|---------------|----------------------------|
| drANKS6-MO1   | TCAGCGCCGTGTTTCCATCCTCATC  |
| drNEK8-ATG-MO | CTTCTCATACTTCTCCATGTTTTTCG |

Supplementary Table 4 | Primer and morpholino sequences
